# Supplementary material for: dCas9-VPR-mediated transcriptional activation of functionally equivalent genes for gene therapy
Source: Springer Nature journal article supplement (doi:10.1038/s41596-021-00666-3), 2022-02-07
Supplement: MOESM1 [file 41596_2021_666_MOESM1_ESM14.xlsx]

## Sheet: Tabelle1
Supplementary Table 1: Human IRD-linked genes and potential functionally equivalent counterparts
The list of genes represents only a rough guideline, which according to our criteria based on sequence and structural homology fulfill the formal requirements for the respective genes to be considered functional equivalents to the diseased gene. However, these criteria do not constitute proof that each of the listed genes is actually suitable to take over the function of the diseased gene. Theref…
Gene	Disease	Functionally equivalent gene
ABCA4	Cone or cone-rod Dystrophy, Retinitis pigmentosa	ABCA1, ABCA7
ABCC6	Syndromic/systemic diseases with retinopathy	ABCC3
ABHD12	Usher syndrome	-
ACBD5	Syndromic/systemic diseases with retinopathy	-
ACO2	Optic atrophy	-
ADAM9	Cone or cone-rod Dystrophy	ADAM21, ADAM20, ADAM19
ADAMTS18	Syndromic/systemic diseases with retinopathy	ADAMTS16, ADAMTS6, ADAMTS10, ADAMTS17
ADGRA3	Retinitis pigmentosa	ADGRA2
ADGRV1	Usher syndrome	-
ADIPOR1	Bardet-Biedel syndrome	ADIPOR2
AFG3L2	Optic atrophy	SPG7
AGBL5	Retinitis pigmentosa	-
AHI1	Syndromic/systemic diseases with retinopathy	-
AHR	Retinitis pigmentosa	-
AIPL1	Leber congenital amaurosis, Cone or cone-rod dystrophy	AIP
ALMS1	Alström, Cone or cone-rod Dystrophy, Leber congenital amaurosis	-
ARHGEF18	Retinitis pigmentosa	ARHGEF28
ARL13B	Joubert syndrome	-
ARL2BP	Retinitis pigmentosa	-
ARL3	Retinitis pigmentosa	ARL2
ARL6	Bardet-Biedel syndrome, Retinitis pigmentosa	ARF6, ARL3, ARL1
ARSG	Usher syndrome	ARSD
ASRGL1	Early-onset retinal degeneration	TASP1
ATF6	Cone or cone-rod Dystrophy	ATF6B
ATXN7	Syndromic/systemic diseases with retinopathy	ATXN7L1
BBIP1	Bardet-Biedel syndrome	-
BBS1	Bardet-Biedel syndrome, Retinitis pigmentosa	-
BBS10	Bardet-Biedel syndrome	-
BBS12	Bardet-Biedel syndrome	-
BBS2	Bardet-Biedel syndrome, Retinitis pigmentosa	-
BBS4	Bardet-Biedel syndrome	-
BBS5	Bardet-Biedel syndrome	-
BBS7	Bardet-Biedel syndrome	-
BBS9	Bardet-Biedel syndrome	-
BEST1	Retinitis pigmentosa	-
C8orf37	Retinitis pigmentosa, Bardet-Biedl syndrome, Cone or cone-rod dystrophy	-
CA4	Retinitis pigmentosa	CA14
CABP4	Leber congenital amaurosis, Cone or cone-rod dystrophy	CABP2, CABP1, CABP5
CACNA1F	Cone or cone-rod Dystrophy, Congenital stationary night blindness	CACNA1D
CACNA2D4	Cone or cone-rod Dystrophy	CACNA2D3
CAPN5	Neovascular inflammatory vitreoretinopathy	CAPN6
CC2D2A	Joubert syndrome	CC2D2B
CCT2	Leber congenital amaurosis	CCT7, CCT1, CCT5, CCT4
CDH23	Usher syndrome	FAT4
CDH3	Hypotrichosis with juvenile macular dystrophy	CDH1, CDH2, CDH4, CDH15, CDH13, CDH6, CDH7, CDH18
CDHR1	Cone or cone-rod Dystrophy	-
CEP104	Joubert syndrome	-
CEP164	Joubert syndrome, Senior-Loken syndrome/nephronophthisis	-
CEP19	Bardet-Biedel syndrome	-
CEP250	Usher syndrome	CROCC
CEP290	Bardet-Biedel syndrome, Retinitis pigmentosa	-
CEP41	Joubert syndrome	-
CEP83	Senior-Loken syndrome/ nephronophthisis	-
CERKL	Cone or cone-rod Dystrophy, Retinitis pigmentosa	-
CFH	Macular degeneration	-
CIB2	Usher syndrome	CIB3
CLCC1	Retinitis pigmentosa	-
CLN3	Syndromic/systemic diseases with retinopathy	-
CLRN1	Retinitis pigmentosa, Usher syndrome	-
CLUAP1	Leber congenital amaurosis	-
CNGA1	Retinitis pigmentosa	CNGA3
CNGA3	Achromatopsia, Cone or cone-rod Dystrophy	CNGA1
CNGB1	Retinitis pigmentosa	CNGB3
CNGB3	Achromatopsia, Cone or cone-rod Dystrophy	CNGB1
CNNM4	Cone or cone-rod Dystrophy	CNNM3
COL11A1	Syndromic/systemic diseases with retinopathy	COL5A1, COL11A2
COL2A1	Syndromic/systemic diseases with retinopathy	COL1A1, COL5A2
COL9A1	Syndromic/systemic diseases with retinopathy	COL19A1
CRB1	Leber congenital amaurosis, Retinitis pigmentosa	CRB2
CRX	Leber congenital amaurosis, Retinitis pigmentosa, Cone or cone-rod dystropy	OTX2, OTX1, ARGFX
CSPP1	Joubert syndrome	-
CTNNA1	Macular degeneration	CTNNA2, CTNNA3
CYP4V2	Retinitis pigmentosa	CYP4F2, CYP4F3
DHDDS	Retinitis pigmentosa	-
DHX38	Retinitis pigmentosa	-
DRAM2	Macular degeneration	DRAM1
DTHD1	Leber congenital amaurosis	-
EFEMP1	Macular degeneration	EFEMP2
ELOVL4	Macular degeneration	ELOVL2, ELOVL5, ELOVL7, ELOVL1
EMC1	Retinitis pigmentosa	-
ESPN	Usher syndrome	-
EXOSC2	Syndromic/systemic diseases with retinopathy	-
EYS	Retinitis pigmentosa	-
FAM161A	Retinitis pigmentosa	-
FLVCR1	Syndromic/systemic diseases with retinopathy	FLVCR2
FSCN2	Retinitis pigmentosa	FSCN1
FZD4	Criswick-Schepens syndrome	FZD10, FZD9, FZD2, FZD1, FZD5, FZD7
GDF6	Leber congenital amaurosis	GDF5, GDF7
GNAT1	Cone or cone-rod Dystrophy, Congenital stationary night blindness	GNAT2, GNAT3
GNAT2	Cone or cone-rod Dystrophy	GNAT1, GNAT3
GNB3	Congenital Stationary Blindness	GNB2, GNB5
GNPTG	Syndromic/systemic diseases with retinopathy	-
GPR179	Congenital Stationary Blindness	-
GRK1	Congenital Stationary Blindness	GRK5
GRM6	Congenital Stationary Blindness	GRM8, GRM7
GUCA1A	Cone or cone-rod Dystrophy	GUCA1B, GUCA1C
GUCA1B	Retinitis pigmentosa	GUCA1A, GUCA1C
GUCY2D	Leber congenital amaurosis, Cone or cone-rod dystrophy	GUCY2F
HARS1	Usher syndrome	HARS2
HGSNAT	Retinitis pigmentosa	-
HK1	Retinitis pigmentosa	HK2, HKDC1, HK3
HMCN1	Macular degeneration	-
HMX1	Syndromic/systemic diseases with retinopathy	-
IDH3B	Retinitis pigmentosa	IDH3G, IDH2A
IFT140	Leber congenital amaurosis, Retinitis pigmentosa	-
IFT172	Bardet-Biedel syndrome, Retinitis pigmentosa	-
IFT27	Bardet-Biedel syndrome	RAB35
IFT81	Cone or cone-rod Dystrophy	-
IMPDH1	Leber congenital amaurosis, Retinitis pigmentosa	IMPDH2
IMPG1	Macular degeneration	-
IMPG2	Retinitis pigmentosa	-
INPP5E	Bardet-Biedel syndrome	INPP5D
INVS	Senior-Loken syndrome/ nephronophthisis	-
IQCB1	Leber congenital amaurosis	-
ITM2B	Retinal dystrophy with inner retinal dysfunction and ganglion cell abnormalities	ITM2C, ITM2B
JAG1	Syndromic/systemic diseases with retinopathy	JAG2
KCNJ13	Bardet-Biedel syndrome, Retinitis pigmentosa	KCNJ10, KCNJ15, KCN1
KCNV2	Cone or cone-rod Dystrophy	KCNS3, KCNB2, KCNB1, KCNV1
KIAA1549	Retinitis pigmentosa	-
KIF11	Syndromic/systemic diseases with retinopathy	-
KIZ	Retinitis pigmentosa	-
KLHL7	Retinitis pigmentosa	KLHL3, KLHL20, KLHL17, KLHL12, KEAP1, KLHL8, KLHL18
LAMA1	Syndromic/systemic diseases with retinopathy	LAMA2
LCA5	Leber congenital amaurosis	-
LRAT	Leber congenital amaurosis, Retinitis pigmentosa	-
LRIT3	Congenital Stationary Blindness	LRIT1
LRP5	Syndromic/systemic diseases with retinopathy	LRP6
LZTFL1	Bardet-Biedel syndrome	-
MAK	Retinitis pigmentosa	CILK1
MAPKAPK3	Martinique crinkled retinal pigment epitheliopathy	MAPKAPK2, MAPKAP5
MERTK	Leber congenital amaurosis, Retinitis pigmentosa	AXL, TYRO3
MFN2	Optic atrophy	-
MFRP	Nanophthalmos, Microphthalmia-retinitis pigmentosa-foveoschisis-optic disc drusen syndrome	-
MFSD8	Macular degeneration	-
MIR204	Familial progressive retinal dystrophy-iris coloboma-congenital cataract syndrome	-
MKKS	Bardet-Biedel syndrome	-
MKS1	Bardet-Biedel syndrome	-
MVK	Retinitis pigmentosa	-
MYO7A	Usher syndrome	MYO7B
NBAS	Optic atrophy	-
NEK2	Retinitis pigmentosa	-
NEUROD1	Retinitis pigmentosa	NEUROD4, NEUROD6, NEUROD2
NMNAT1	Leber congenital amaurosis	NMNAT3, NMNAT2
NPHP1	Bardet-Biedel syndrome	-
NPHP3	Senior-Loken syndrome/ nephronophthisis	-
NPHP4	Joubert syndrome, Senior-Loken syndrome/nephronophthisis	-
NR2E3	Retinitis pigmentosa	NR2E1, NR2F6, NR2F1, NR2F2, RXRG, RXRA
NR2F1	Optic atrophy	NR2F2, NR2F6, RXRA
NRL	Retinitis pigmentosa	MAFB, MAFA, MAF
NYX	Congenital Stationary Blindness	LINGO1
OAT	Gyrate atrophy of the choroid and retina	-
OFD1	Retinitis pigmentosa	-
OPA1	Optic atrophy	-
OPA3	Syndromic/systemic diseases with retinopathy	-
OPN1SW	Tritanopia	RHO, OPN1MW, OPN1LW
OTX2	Leber congenital amaurosis	OTX1, CRX
PAX2	Syndromic/systemic diseases with retinopathy	PAX5, PAX8, PAX6
PCARE	Retinitis pigmentosa	-
PCDH15	Usher syndrome	-
PCYT1A	Syndromic/systemic diseases with retinopathy	PCYT1B
PDE6A	Retinitis pigmentosa	PDE6C, PDE6B
PDE6B	Congenital Stationary Blindness, Retinitis pigmentosa	PDE6C, PDE6A
PDE6C	Achromatopsia, Cone or cone-rod Dystrophy	PDE6A, PDE6B
PDE6G	Retinitis pigmentosa	PDE6H
PDE6H	Cone or cone-rod Dystrophy	PDE6G
PEX1	Syndromic/systemic diseases with retinopathy	-
PEX2	Syndromic/systemic diseases with retinopathy	-
PEX7	Syndromic/systemic diseases with retinopathy	-
PGK1	Phosphoglycerate kinase 1 deficiency	PGK2
PHYH	Syndromic/systemic diseases with retinopathy	-
PITPNM3	Cone or cone-rod Dystrophy	PITPNM2, PITPNM1
PLA2G5	Familial benign flecked retina	PLA2G2A, PLA2G2D, PLA2G2E, PLA2G10, PLA2G2F, PLA2G2C
PLK4	Syndromic/systemic diseases with retinopathy	-
PNPLA6	Syndromic/systemic diseases with retinopathy	PNPLA7
POC1B	Cone or cone-rod Dystrophy	POC1A
POC5	Syndromic/systemic diseases with retinopathy	-
POMGNT1	Retinitis pigmentosa	-
PRCD	Retinitis pigmentosa	-
PRDM13	Chorioretinal atrophy	-
PROM1	Cone or cone-rod Dystrophy, Retinitis pigmentosa	-
PRPF3	Retinitis pigmentosa	-
PRPF31	Retinitis pigmentosa	-
PRPF4	Retinitis pigmentosa	-
PRPF6	Retinitis pigmentosa	-
PRPF8	Retinitis pigmentosa	-
PRPH2	Leber congenital amaurosis, Retinitis pigmentosa, Cone or cone-rod dystropy	ROM1
PRPS1	Syndromic/systemic diseases with retinopathy	PRPS2, PRPS1L1
RAB28	Cone or cone-rod Dystrophy	RAB8A
RAX2	Cone or cone-rod Dystrophy	-
RB1	Retinoblastoma	-
RBP3	Retinitis pigmentosa	-
RBP4	Microphthalmia-anophthalmia-coloboma syndrome	-
RCBTB1	Reticular dystrophy of the retinal pigment epithelium	RCBTB2, HERC4
RD3	Leber congenital amaurosis	-
RDH11	Syndromic/systemic diseases with retinopathy	RDH12, RDH13, RDH14
RDH12	Leber congenital amaurosis, Retinitis pigmentosa	RDH11, RDH13, RDH14
RDH5	Cone or cone-rod Dystrophy, Congenital stationary night blindness	RDH16, HSD17B6
RGR	Retinitis pigmentosa	-
RGS9	Bradyopsia	RGS11, RGS6, RGS7
RGS9BP	Bradyopsia	-
RHO	Congenital Stationary Blindness, Retinitis pigmentosa	OPN1SW, OPN1MW
RIMS1	Cone or cone-rod Dystrophy	RIMS2
RLBP1	Retinitis pigmentosa	CLVS1, CLVS2
ROM1	Retinitis pigmentosa	PRPH2
RP1	Retinitis pigmentosa	-
RP1L1	Retinitis pigmentosa	-
RP2	Retinitis pigmentosa	-
RP9	Retinitis pigmentosa	-
RPE65	Leber congenital amaurosis, Retinitis pigmentosa	BCO2, BCO1
RPGR	Cone or cone-rod Dystrophy, Retinitis pigmentosa, Macular degeneration	-
RPGRIP1	Leber congenital amaurosis, Cone or cone-rod dystrophy	-
RPGRIP1L	Joubert syndrome, Senior-Loken syndrome/nephronophthisis	-
RTN4IP1	Optic atrophy	-
SAG	Congenital Stationary Blindness, Retinitis pigmentosa	ARRB1
SAMD11	Retinitis pigmentosa	-
SDCCAG8	Bardet-Biedel syndrome	-
SEMA4A	Cone or cone-rod Dystrophy, Retinitis pigmentosa	SEMA4B, SEMA4C, SEMA4D
SLC24A1	Congenital Stationary Blindness	-
SLC25A46	Syndromic/systemic diseases with retinopathy	-
SLC7A14	Retinitis pigmentosa	SLC7A1, SLC7A2, SLC7A3
SNRNP200	Retinitis pigmentosa	ASCC3
SPATA7	Leber congenital amaurosis, Retinitis pigmentosa	-
SPP2	Retinitis pigmentosa	-
TEAD1	Chorioretinal atrophy	TEAD4, TEAD3, TEAD2
TIMM8A	Optic atrophy	-
TIMP3	Macular degeneration	TIMP4, TIMP2, TIMP1
TMEM126A	Optic atrophy	-
TMEM138	Joubert syndrome	-
TMEM216	Joubert syndrome	TMEM80
TMEM231	Joubert syndrome	-
TMEM67	Joubert syndrome, Senior-Loken syndrome/nephronophthisis	-
TOPORS	Retinitis pigmentosa	-
TRAF3IP1	Senior-Loken syndrome/ nephronophthisis	-
TREX1	Syndromic/systemic diseases with retinopathy	TREX2
TRIM32	Bardet-Biedel syndrome	-
TRNT1	Retinitis pigmentosa	-
TRPM1	Congenital Stationary Blindness	TRPM2
TSPAN12	Familial exudative vitreoretinopathy	-
TTC8	Bardet-Biedel syndrome, Retinitis pigmentosa	-
TTLL5	Cone or cone-rod Dystrophy	-
TTPA	Syndromic/systemic diseases with retinopathy	TTPAL
TUB	Syndromic/systemic diseases with retinopathy	TULP3, TULP1, TULP2
TUBGCP4	Syndromic/systemic diseases with retinopathy	-
TUBGCP6	Syndromic/systemic diseases with retinopathy	-
TULP1	Leber congenital amaurosis, Retinitis pigmentosa	TUB, TULP3, TULP2
UNC119	Cone or cone-rod Dystrophy	-
USH1C	Usher syndrome	-
USH1G	Usher syndrome	-
USH2A	Retinitis pigmentosa, Usher syndrome	-
VCAN	Ocular-retinal developmental disease	-
WDPCP	Syndromic/systemic diseases with retinopathy	-
WDR19	Joubert syndrome, Senior-Loken syndrome/nephronophthisis	-
WFS1	Syndromic/systemic diseases with retinopathy	-
WHRN	Usher syndrome	-
ZNF408	Retinitis pigmentosa	-
ZNF423	Joubert syndrome, Senior-Loken syndrome/nephronophthisis	ZNF521
ZNF513	Retinitis pigmentosa	-
